# Supplementary figures and images for: Evaluation of cell-free tumour DNA and RNA in patients with breast cancer and benign breast disease
Source: Royal Society of Chemistry journal article supplement (doi:10.1039/c1mb05197k), 2011-07-22

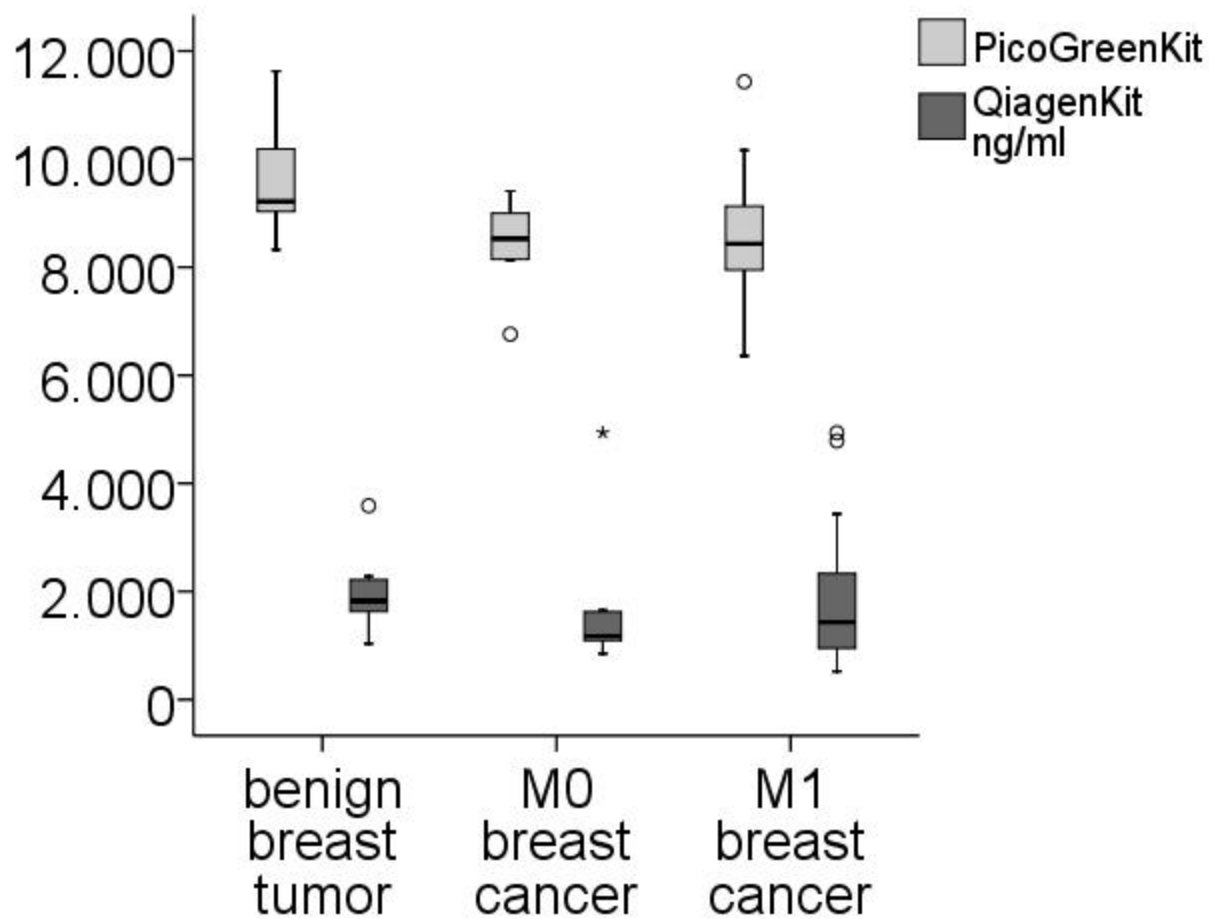

Supplement: c1mb05197k.pdf [file c1mb05197k.pdf]
